# Supplementary material for: In Silico Analyses of a Promising Drug Candidate for the Treatment of Amyotrophic Lateral Sclerosis Targeting Superoxide Dismutase I Protein
Source: MDPI journal article supplement (doi:10.3390/pharmaceutics15041095), 2023-03-29
Supplement: s1 [file s1]

Table S2. ADMET Predictor™ analysis of SBL-1 compound and predicted metabolites.

| Structure                                                                           | ID        | Metabolization                                    | ADMET Risk          | ABS Risk  | CYP Risk | TOX Risk | MUT Risk         | MUTx Risk         | hERG Toxicity | Acute Toxicity | Carcinog. TOX | REPRO Tox | HEPX     | Lipinski's Violations | CYP inhibition         |
|-------------------------------------------------------------------------------------|-----------|---------------------------------------------------|---------------------|-----------|----------|----------|------------------|-------------------|---------------|----------------|---------------|-----------|----------|-----------------------|------------------------|
| 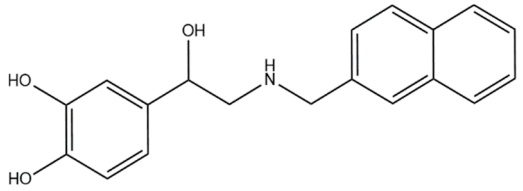   | SBL1      | —                                                 | 2,5 [HBD; MUT; 2D6] | 0,5 [HBD] | 1 [2D6]  | 1 [MUT]  | 1,2 [S_97; NIHS] | 0,64 [S_97; NIHS] | No            | No             | No            | No        | No [AST] | 0                     | CYP1A2, CYP2D6, CYP3A4 |
|    | SBL1-M1   | Phase I: CYP2D6 [40%]                             | —                   | —         | —        | —        | 1,2 [S_97; NIHS] | 0,64 [S_97; NIHS] | No            | —              | —             | No        | —        | —                     | CYP2D6, CYP3A4         |
|    | SBL1-M2   | Phase I: CYP2D6 [46%]                             | —                   | —         | —        | —        | 1,2 [S_97; NIHS] | 0,64 [S_97; NIHS] | No            | —              | —             | No        | —        | —                     | CYP2D6, CYP3A4         |
|  | SBL1-M3.1 | Phase I: CYP2D6 [14%]                             | —                   | —         | —        | —        | 1,2 [m_97; NIHS] | 0,61 [m_97; NIHS] | No            | —              | —             | No        | —        | —                     | CYP1A2, CYP2C19        |
|  | SBL1-M3.2 | Phase I: CYP2D6 [14%]                             | —                   | —         | —        | —        | 0,6 [NIHS]       | 0,3 [NIHS]        | No [hERG-]    | —              | —             | No        | —        | —                     | No                     |
|  | SBL1-M4   | Phase II: UGT1A1, UGT1A6, UGT1A9, UGT1A10, UGT2B7 | —                   | —         | —        | —        | 0,6 [S_97]       | 0,34 [S_97]       | No [hERG-]    | —              | —             | No        | —        | —                     | CYP3A4                 |

|                                                                                     |            |                                                                                      |   |   |   |   |                     |                         |               |   |   |    |   |   |        |
|-------------------------------------------------------------------------------------|------------|--------------------------------------------------------------------------------------|---|---|---|---|---------------------|-------------------------|---------------|---|---|----|---|---|--------|
| 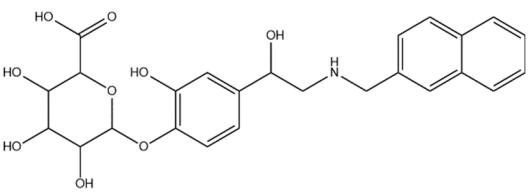   | SBL1-M5    | Phase II:<br>UGT1A1,<br>UGT1A6,<br>UGT1A9,<br>UGT1A10,<br>UGT2B7                     | – | – | – | – | 0,6 [S_97]          | 0,34<br>[S_97]          | No<br>[hERG-] | – | – | No | – | – | CYP3A4 |
|    | SBL1-M6    | Phase II: UGT1A3                                                                     | – | – | – | – | 1,2 [S_97;<br>NIHS] | 0,64<br>[S_97;<br>NIHS] | No<br>[hERG-] | – | – | No | – | – | CYP3A4 |
|    | SBL1-M1-M1 | Phase I: CYP2D6;<br>Phase II:<br>UGT1A1,<br>UGT1A6,<br>UGT1A9,<br>UGT1A10,<br>UGT2B7 | – | – | – | – | 0,6 [S_97]          | 0,34<br>[S_97]          | No<br>[hERG-] | – | – | No | – | – | CYP3A4 |
|   | SBL1-M1-M2 | Phase I: CYP2D6;<br>Phase II:<br>UGT1A1,<br>UGT1A6,<br>UGT1A9,<br>UGT1A10,<br>UGT2B7 | – | – | – | – | 0,6 [S_97]          | 0,34<br>[S_97]          | No<br>[hERG-] | – | – | No | – | – | CYP3A4 |
|  | SBL1-M1-M3 | Phase I: CYP2D6;<br>Phase II:<br>UGT1A1,<br>UGT1A6,<br>UGT1A9,<br>UGT1A10,<br>UGT2B7 | – | – | – | – | 0,6 [S_97]          | 0,34<br>[S_97]          | No<br>[hERG-] | – | – | No | – | – | CYP3A4 |
|  | SBL1-M1-M4 | Phase I: CYP2D6;<br>Phase II: UGT1A3                                                 | – | – | – | – | 1,2 [S_97;<br>NIHS] | 0,64<br>[S_97;<br>NIHS] | No<br>[hERG-] | – | – | No | – | – | CYP3A4 |

|                                                                                     |              |                                                                                      |   |   |   |   |                     |                      |            |   |   |    |   |   |        |
|-------------------------------------------------------------------------------------|--------------|--------------------------------------------------------------------------------------|---|---|---|---|---------------------|----------------------|------------|---|---|----|---|---|--------|
| 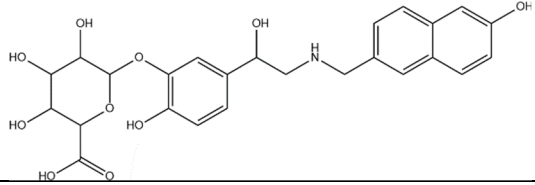   | SBL1-M2-M1   | Phase I: CYP2D6;<br>Phase II:<br>UGT1A1,<br>UGT1A6,<br>UGT1A9,<br>UGT1A10,<br>UGT2B7 | – | – | – | – | 0,6 [S_97]          | 0,34 [S_97]          | No [hERG-] | – | – | No | – | – | CYP3A4 |
|    | SBL1-M2-M2   | Phase I: CYP2D6;<br>Phase II:<br>UGT1A1,<br>UGT1A6,<br>UGT1A9,<br>UGT1A10,<br>UGT2B7 | – | – | – | – | 0,6 [S_97]          | 0,34 [S_97]          | No [hERG-] | – | – | No | – | – | CYP3A4 |
|    | SBL1-M2-M3   | Phase I: CYP2D6;<br>Phase II:<br>UGT1A1,<br>UGT1A6,<br>UGT1A9,<br>UGT1A10,<br>UGT2B7 | – | – | – | – | 0,6 [S_97]          | 0,34 [S_97]          | No [hERG-] | – | – | No | – | – | CYP3A4 |
|   | SBL1-M2-M4   | Phase I: CYP2D6;<br>Phase II: UGT1A3                                                 | – | – | – | – | 1,2 [S_97;<br>NIHS] | 0,64 [S_97;<br>NIHS] | No [hERG-] | – | – | No | – | – | CYP3A4 |
|  | SBL1-M3.2-M1 | Phase I: CYP2D6;<br>Phase II: UGT1A6                                                 | – | – | – | – | 0                   | 0                    | No [hERG-] | – | – | No | – | – | CYP3A4 |
|  | SBL1-M3.2-M2 | Phase I: CYP2D6;<br>Phase II: UGT1A6                                                 | – | – | – | – | 0                   | 0                    | No [hERG-] | – | – | No | – | – | CYP3A4 |

The respective ADMET-rule violation is shown between brackets. HBD: hydrogen bond donor; HEPX: hepatotoxicity; MUT: mutagenic; 2D6: increased intrinsic clearance for CYP2D6; S\_97: mutagenic in *S. Typhimurium* TA97+TA1537 strains without microsomal activation; NIHS: classified as mutagenic by a model trained on the NIHS’s Ames test dataset; hERG-: out-of-scope cardiotoxicity in rats; AST: elevated levels of aspartic acid transaminase in serum; Underline (“\_”) represents analysis not performed for the metabolites.
