# Supplementary material for: In Silico Analyses of a Promising Drug Candidate for the Treatment of Amyotrophic Lateral Sclerosis Targeting Superoxide Dismutase I Protein
Source: MDPI journal article supplement (doi:10.3390/pharmaceutics15041095), 2023-03-29
Supplement: s1 [file s1]

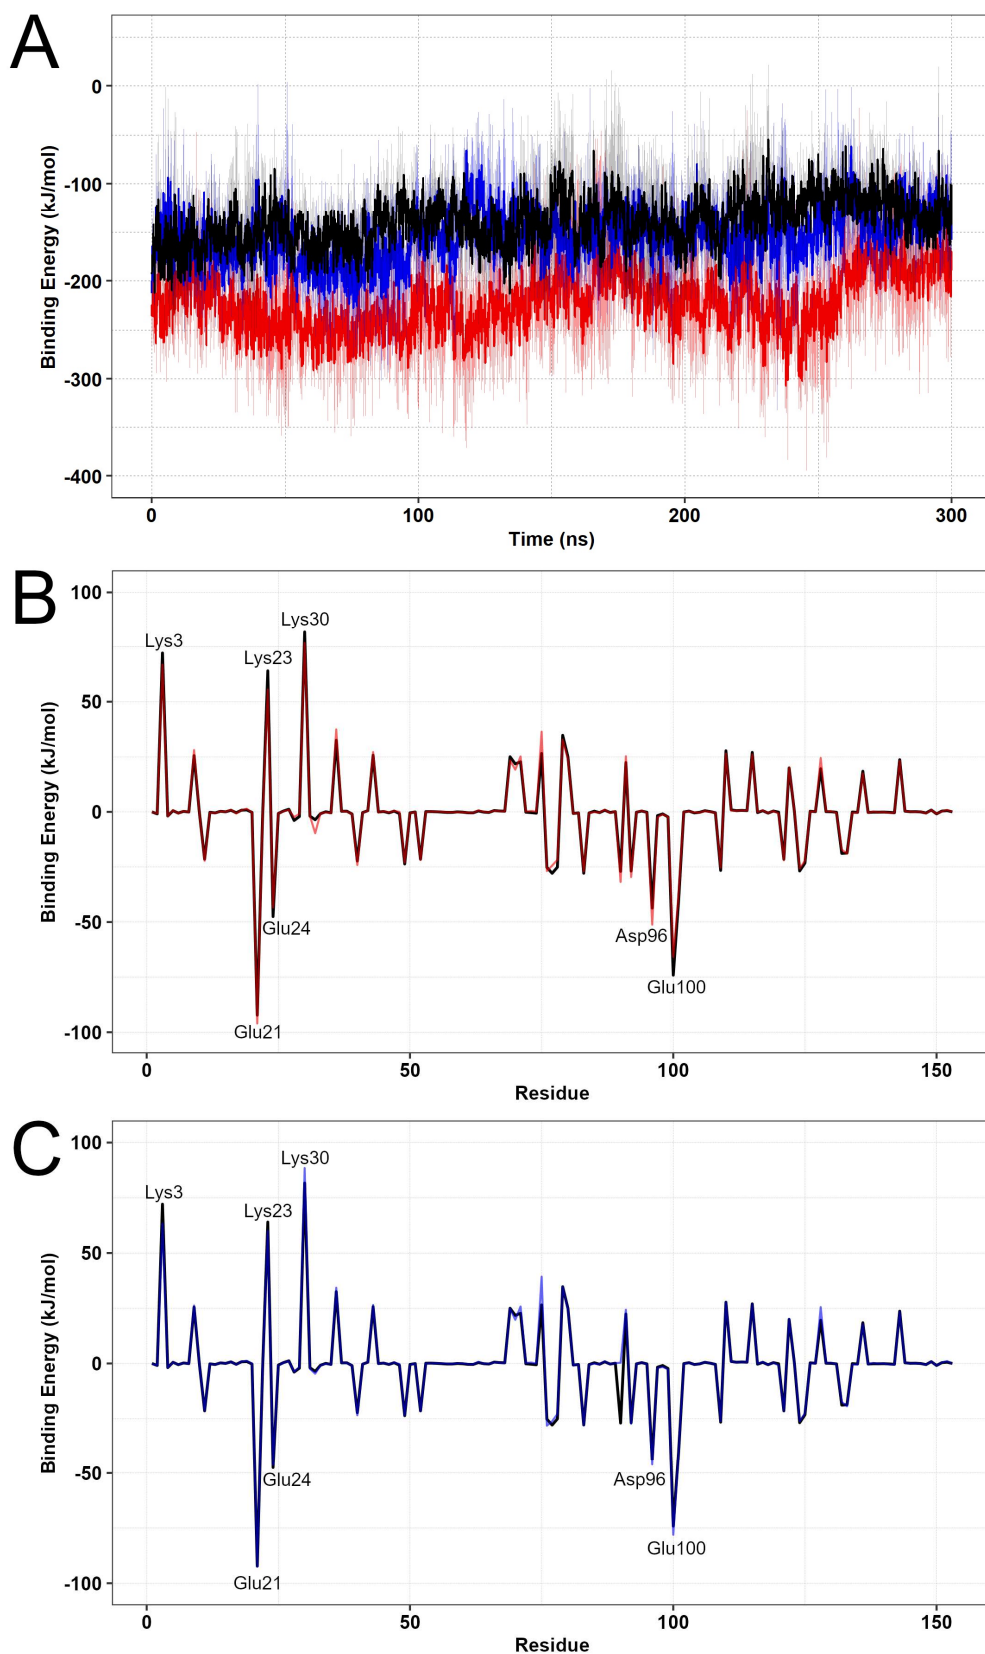

**Figure S3.** MMPBSA analysis of SOD1-SBL-1 complexes. (A) Binding energy values calculated from the interactions of SOD1 wild-type (black) and its variants A4V (red) and D90A (blue) with the SBL-1 compound are shown as a function of time. The means (solid lines) and confidence intervals (smooth lines) are displayed for the triplicates. (B) Energetic contribution of each residue of SOD1 wild-type (black) and variant A4V (red) to SBL-1 interaction. (C) Energetic contribution of each residue of SOD1 wild-type (black) and variant D90A (blue) to SBL-1 interaction.
