# Supplementary material for: In Silico Analyses of a Promising Drug Candidate for the Treatment of Amyotrophic Lateral Sclerosis Targeting Superoxide Dismutase I Protein
Source: MDPI journal article supplement (doi:10.3390/pharmaceutics15041095), 2023-03-29
Supplement: s1 [file s1]

**Table S1. Energetic contribution of each SOD1 residue to SBL-1 interaction computed from the MMPBSA analysis.**

| Residue | Wild-type |          | A4V    |          | D90A   |          |
|---------|-----------|----------|--------|----------|--------|----------|
|         | $\mu$     | $\sigma$ | $\mu$  | $\sigma$ | $\mu$  | $\sigma$ |
| ALA-1   | 0,00      | 0,00     | 0,00   | 0,00     | 0,00   | 0,00     |
| THR-2   | -0,91     | 1,11     | -0,72  | 0,79     | -0,97  | 0,73     |
| LYS-3   | 72,12     | 9,14     | 66,85  | 5,43     | 63,34  | 4,18     |
| ALA-4   | -1,88     | 0,19     | -1,97  | 0,24     | -1,87  | 0,20     |
| VAL-5   | 0,54      | 0,14     | 0,82   | 0,24     | 0,56   | 0,13     |
| CYS-6   | -0,55     | 0,19     | -0,74  | 0,22     | -0,59  | 0,18     |
| VAL-7   | 0,22      | 0,13     | 0,39   | 0,19     | 0,24   | 0,10     |
| LEU-8   | -0,07     | 0,10     | -0,17  | 0,21     | -0,06  | 0,10     |
| LYS-9   | 25,52     | 1,67     | 28,06  | 2,25     | 26,23  | 1,58     |
| GLY-10  | -0,13     | 0,11     | -0,24  | 0,21     | -0,17  | 0,13     |
| ASP-11  | -21,46    | 0,75     | -22,19 | 1,21     | -21,33 | 0,70     |
| GLY-12  | -0,17     | 0,11     | -0,23  | 0,19     | -0,19  | 0,12     |
| PRO-13  | -0,47     | 0,10     | -0,60  | 0,22     | -0,49  | 0,09     |
| VAL-14  | 0,26      | 0,08     | 0,29   | 0,11     | 0,28   | 0,08     |
| GLN-15  | 0,03      | 0,70     | -0,02  | 0,92     | -0,05  | 0,69     |
| GLY-16  | 0,73      | 0,13     | 0,97   | 0,28     | 0,77   | 0,13     |
| ILE-17  | -0,40     | 0,25     | -0,71  | 0,40     | -0,55  | 0,25     |
| ILE-18  | 0,76      | 0,19     | 0,76   | 0,26     | 0,85   | 0,22     |
| ASN-19  | 0,88      | 1,73     | 1,43   | 1,18     | 1,16   | 1,03     |
| PHE-20  | -0,24     | 0,47     | -0,31  | 0,61     | -0,07  | 0,49     |
| GLU-21  | -92,25    | 12,72    | -96,03 | 13,96    | -92,47 | 15,27    |
| GLN-22  | -3,14     | 2,32     | -3,26  | 2,98     | -2,85  | 2,02     |
| LYS-23  | 64,03     | 10,77    | 55,55  | 9,73     | 60,04  | 7,61     |
| GLU-24  | -47,52    | 3,17     | -43,33 | 5,78     | -46,29 | 2,95     |
| SER-25  | -0,73     | 0,49     | -0,72  | 0,63     | -0,87  | 0,43     |
| ASN-26  | 0,42      | 0,41     | 0,32   | 0,52     | 0,36   | 0,38     |
| GLY-27  | 1,19      | 0,36     | 0,89   | 0,41     | 1,11   | 0,42     |
| PRO-28  | -3,89     | 2,78     | -2,34  | 2,37     | -3,74  | 4,41     |
| VAL-29  | -2,13     | 1,19     | -0,89  | 1,53     | -1,58  | 1,54     |
| LYS-30  | 81,67     | 9,78     | 76,62  | 12,40    | 88,48  | 11,38    |
| VAL-31  | -1,92     | 0,80     | -1,84  | 0,84     | -2,41  | 0,89     |
| TRP-32  | -3,57     | 4,05     | -9,68  | 3,52     | -4,64  | 3,60     |
| GLY-33  | -0,82     | 0,37     | -0,72  | 0,57     | -0,86  | 0,39     |
| SER-34  | 0,04      | 0,77     | -0,22  | 1,05     | -0,12  | 0,72     |
| ILE-35  | -0,44     | 0,14     | -0,60  | 0,23     | -0,48  | 0,15     |
| LYS-36  | 32,50     | 3,18     | 37,42  | 4,95     | 34,30  | 2,25     |
| GLY-37  | 0,27      | 0,09     | 0,34   | 0,18     | 0,29   | 0,10     |
| LEU-38  | 0,31      | 0,13     | 0,16   | 0,22     | 0,21   | 0,18     |
| THR-39  | -0,97     | 0,19     | -0,96  | 0,35     | -0,88  | 0,28     |
| GLU-40  | -22,29    | 0,87     | -24,12 | 1,55     | -23,45 | 0,99     |
| GLY-41  | -0,34     | 0,10     | -0,36  | 0,13     | -0,30  | 0,11     |
| LEU-42  | 0,56      | 0,09     | 0,52   | 0,15     | 0,58   | 0,10     |
| HIS-43  | 25,69     | 0,83     | 27,16  | 1,16     | 26,49  | 0,76     |

|        |        |      |        |      |        |      |
|--------|--------|------|--------|------|--------|------|
| GLY-44 | -0,05  | 0,13 | -0,28  | 0,14 | -0,16  | 0,09 |
| PHE-45 | 0,16   | 0,17 | 0,33   | 0,19 | 0,24   | 0,17 |
| HIS-46 | -0,44  | 0,42 | -0,24  | 0,39 | -0,39  | 0,37 |
| VAL-47 | 0,35   | 0,08 | 0,41   | 0,10 | 0,39   | 0,10 |
| HIS-48 | -0,81  | 0,17 | -0,01  | 0,25 | -0,23  | 0,35 |
| GLU-49 | -23,65 | 0,79 | -22,98 | 1,27 | -23,54 | 0,77 |
| PHE-50 | -0,44  | 0,10 | -0,50  | 0,09 | -0,49  | 0,09 |
| GLY-51 | -0,05  | 0,09 | -0,07  | 0,15 | -0,05  | 0,09 |
| ASP-52 | -21,47 | 0,59 | -21,86 | 0,78 | -21,63 | 0,57 |
| ASN-53 | 0,11   | 0,23 | -0,04  | 0,40 | 0,01   | 0,37 |
| THR-54 | 0,14   | 0,24 | 0,20   | 0,35 | 0,13   | 0,23 |
| ALA-55 | 0,05   | 0,17 | 0,06   | 0,13 | 0,05   | 0,10 |
| GLY-56 | -0,09  | 0,17 | 0,05   | 0,14 | 0,04   | 0,18 |
| CYS-57 | -0,25  | 0,14 | -0,20  | 0,16 | -0,17  | 0,17 |
| THR-58 | -0,24  | 0,20 | -0,17  | 0,33 | -0,14  | 0,20 |
| SER-59 | -0,01  | 0,16 | -0,15  | 0,26 | 0,06   | 0,26 |
| ALA-60 | -0,13  | 0,13 | -0,16  | 0,14 | 0,05   | 0,26 |
| GLY-61 | -0,40  | 0,10 | -0,38  | 0,14 | -0,28  | 0,17 |
| PRO-62 | -0,43  | 0,06 | -0,46  | 0,08 | -0,39  | 0,13 |
| HIS-63 | 0,41   | 0,45 | 0,70   | 0,40 | 0,76   | 0,31 |
| PHE-64 | -0,11  | 0,12 | -0,03  | 0,08 | -0,10  | 0,14 |
| ASN-65 | -0,27  | 0,20 | -0,18  | 0,24 | -0,20  | 0,15 |
| PRO-66 | 0,61   | 0,12 | 0,52   | 0,18 | 0,57   | 0,10 |
| LEU-67 | 0,40   | 0,14 | 0,33   | 0,16 | 0,30   | 0,21 |
| SER-68 | 0,30   | 0,24 | 0,17   | 0,35 | 0,15   | 0,22 |
| ARG-69 | 25,00  | 2,24 | 23,35  | 1,98 | 24,90  | 0,89 |
| LYS-70 | 21,76  | 1,39 | 19,17  | 1,03 | 19,78  | 0,69 |
| HIS-71 | 22,72  | 0,67 | 25,15  | 1,03 | 25,78  | 0,64 |
| GLY-72 | -0,15  | 0,24 | 0,09   | 0,11 | 0,17   | 0,08 |
| GLY-73 | -0,35  | 0,27 | 0,43   | 0,11 | 0,41   | 0,10 |
| PRO-74 | -0,58  | 0,26 | 0,11   | 0,26 | -0,03  | 0,23 |
| LYS-75 | 26,54  | 4,74 | 36,40  | 5,03 | 39,32  | 4,59 |
| ASP-76 | -25,20 | 1,58 | -26,87 | 1,83 | -28,17 | 0,99 |
| GLU-77 | -27,88 | 3,34 | -24,35 | 2,17 | -26,14 | 1,46 |
| GLU-78 | -25,09 | 1,39 | -21,77 | 1,53 | -22,85 | 0,75 |
| ARG-79 | 34,75  | 1,14 | 32,76  | 2,34 | 34,76  | 1,03 |
| HIS-80 | 24,93  | 1,70 | 23,79  | 1,10 | 24,40  | 0,54 |
| VAL-81 | -0,72  | 0,10 | -0,74  | 0,11 | -0,81  | 0,08 |
| GLY-82 | -0,45  | 0,14 | -0,46  | 0,12 | -0,40  | 0,12 |
| ASP-83 | -27,86 | 1,53 | -27,07 | 1,37 | -27,93 | 0,70 |
| LEU-84 | -0,51  | 0,19 | -0,54  | 0,16 | -0,56  | 0,14 |
| GLY-85 | 0,32   | 0,37 | -0,11  | 0,26 | -0,03  | 0,20 |
| ASN-86 | -0,35  | 0,33 | -0,37  | 0,26 | -0,38  | 0,21 |
| VAL-87 | 0,75   | 0,12 | 1,01   | 0,15 | 0,96   | 0,11 |
| THR-88 | -0,28  | 0,38 | -0,47  | 0,43 | -0,35  | 0,37 |
| ALA-89 | 0,11   | 0,17 | 0,29   | 0,17 | 0,16   | 0,12 |
| ASP-90 | -26,99 | 2,68 | -31,79 | 3,69 | 0,34   | 0,22 |

|         |        |      |        |       |        |       |
|---------|--------|------|--------|-------|--------|-------|
| LYS-91  | 22,37  | 1,95 | 25,25  | 2,68  | 24,33  | 1,85  |
| ASP-92  | -26,85 | 1,74 | -29,56 | 2,91  | -27,25 | 1,44  |
| GLY-93  | -0,18  | 0,10 | -0,21  | 0,13  | -0,13  | 0,18  |
| VAL-94  | 0,38   | 0,18 | 0,59   | 0,27  | 0,43   | 0,19  |
| ALA-95  | -0,20  | 0,18 | -0,43  | 0,26  | -0,27  | 0,19  |
| ASP-96  | -43,65 | 3,82 | -51,20 | 7,46  | -46,11 | 4,63  |
| VAL-97  | -1,70  | 0,44 | -2,50  | 0,76  | -2,00  | 0,45  |
| SER-98  | -0,92  | 1,49 | -1,09  | 1,98  | -1,58  | 2,01  |
| ILE-99  | -2,29  | 0,74 | -2,26  | 0,74  | -2,63  | 0,77  |
| GLU-100 | -74,10 | 5,27 | -65,83 | 18,22 | -78,04 | 11,62 |
| ASP-101 | -40,64 | 1,23 | -37,93 | 3,22  | -41,04 | 1,49  |
| SER-102 | -0,06  | 0,78 | -0,07  | 0,68  | -0,14  | 0,84  |
| VAL-103 | 0,36   | 0,22 | 0,28   | 0,19  | 0,31   | 0,15  |
| ILE-104 | -0,47  | 0,19 | -0,28  | 0,26  | -0,51  | 0,20  |
| SER-105 | -0,20  | 0,25 | -0,30  | 0,33  | -0,21  | 0,25  |
| LEU-106 | 0,53   | 0,19 | 0,39   | 0,18  | 0,59   | 0,21  |
| SER-107 | 0,13   | 0,45 | 0,03   | 0,45  | 0,14   | 0,42  |
| GLY-108 | -0,41  | 0,14 | -0,41  | 0,21  | -0,38  | 0,16  |
| ASP-109 | -26,58 | 0,91 | -25,30 | 1,69  | -26,16 | 0,82  |
| HIS-110 | 27,74  | 1,89 | 26,48  | 2,36  | 27,84  | 1,79  |
| CYS-111 | 0,91   | 0,35 | 0,64   | 0,32  | 0,81   | 0,38  |
| ILE-112 | 0,56   | 0,13 | 0,48   | 0,15  | 0,56   | 0,14  |
| ILE-113 | 0,68   | 0,14 | 0,67   | 0,18  | 0,67   | 0,12  |
| GLY-114 | 0,57   | 0,09 | 0,58   | 0,15  | 0,57   | 0,08  |
| ARG-115 | 27,00  | 0,74 | 26,06  | 1,44  | 26,89  | 0,72  |
| THR-116 | -0,33  | 0,28 | -0,04  | 0,16  | -0,10  | 0,17  |
| LEU-117 | 0,52   | 0,12 | 0,58   | 0,11  | 0,64   | 0,11  |
| VAL-118 | -0,57  | 0,12 | -0,54  | 0,12  | -0,59  | 0,11  |
| VAL-119 | 0,38   | 0,07 | 0,39   | 0,08  | 0,39   | 0,07  |
| HIS-120 | -0,13  | 0,34 | -0,77  | 0,25  | -0,83  | 0,16  |
| GLU-121 | -21,47 | 0,72 | -21,99 | 1,05  | -21,52 | 0,64  |
| LYS-122 | 19,94  | 0,64 | 20,20  | 0,90  | 20,23  | 0,74  |
| ALA-123 | 0,27   | 0,31 | 0,49   | 0,15  | 0,51   | 0,10  |
| ASP-124 | -26,82 | 1,24 | -25,64 | 0,99  | -26,11 | 0,83  |
| ASP-125 | -23,25 | 2,22 | -22,23 | 1,02  | -22,58 | 0,75  |
| LEU-126 | 0,29   | 0,26 | 0,18   | 0,10  | 0,18   | 0,08  |
| GLY-127 | 0,09   | 0,24 | 0,13   | 0,13  | 0,12   | 0,08  |
| LYS-128 | 19,59  | 2,33 | 24,48  | 1,79  | 25,52  | 1,19  |
| GLY-129 | 0,10   | 0,28 | 0,20   | 0,13  | 0,22   | 0,07  |
| GLY-130 | 0,06   | 0,39 | 0,24   | 0,19  | 0,27   | 0,09  |
| ASN-131 | -0,19  | 0,43 | -0,45  | 0,21  | -0,42  | 0,20  |
| GLU-132 | -18,85 | 1,31 | -17,12 | 1,00  | -17,47 | 0,55  |
| GLU-133 | -18,67 | 1,05 | -18,98 | 1,03  | -19,38 | 0,75  |
| SER-134 | -0,07  | 0,42 | -0,41  | 0,15  | -0,47  | 0,14  |
| THR-135 | -0,24  | 0,26 | -0,42  | 0,28  | -0,45  | 0,20  |
| LYS-136 | 18,44  | 1,10 | 17,44  | 0,89  | 17,79  | 0,56  |
| THR-137 | -0,27  | 0,32 | -0,43  | 0,29  | -0,42  | 0,20  |

|         |       |      |       |      |       |      |
|---------|-------|------|-------|------|-------|------|
| GLY-138 | -0,13 | 0,16 | 0,12  | 0,24 | 0,21  | 0,21 |
| ASN-139 | -0,15 | 0,34 | -0,21 | 0,29 | -0,16 | 0,22 |
| ALA-140 | -0,10 | 0,15 | -0,08 | 0,15 | 0,04  | 0,14 |
| GLY-141 | -0,21 | 0,34 | -0,46 | 0,18 | -0,47 | 0,09 |
| SER-142 | -0,39 | 0,23 | -0,44 | 0,34 | -0,46 | 0,20 |
| ARG-143 | 23,68 | 0,80 | 23,23 | 0,80 | 23,40 | 0,56 |
| LEU-144 | 0,31  | 0,09 | 0,36  | 0,12 | 0,38  | 0,09 |
| ALA-145 | 0,07  | 0,10 | 0,07  | 0,11 | 0,00  | 0,09 |
| CYS-146 | 0,10  | 0,15 | 0,00  | 0,16 | 0,09  | 0,15 |
| GLY-147 | -0,02 | 0,16 | 0,01  | 0,16 | -0,06 | 0,15 |
| VAL-148 | -0,50 | 0,13 | -0,70 | 0,23 | -0,55 | 0,13 |
| ILE-149 | 0,83  | 0,11 | 0,87  | 0,11 | 0,86  | 0,11 |
| GLY-150 | -0,91 | 0,12 | -0,89 | 0,14 | -0,95 | 0,11 |
| ILE-151 | 0,36  | 0,19 | 0,25  | 0,30 | 0,44  | 0,18 |
| ALA-152 | 0,56  | 0,35 | 0,88  | 0,50 | 1,06  | 0,43 |
| GLN-153 | 0,00  | 0,00 | 0,00  | 0,00 | 0,00  | 0,00 |
